# Supplementary material
Source: Royal Society of Chemistry journal article supplement (doi:10.1039/d6cc02388f)
Supplement: d6cc02388f1.pdf [file d6cc02388f1.pdf]

## Support Information

### Ir Doping Induced Phase Transformation and Morphological Reconstruction of MnO<sub>2</sub> for Efficient Alkaline Water Oxidation

Wenlan Hong, Yu Shuai, Shucheng Liu and Yi Liu\*

(School of Physical Sciences, Guizhou University, Guiyang 550025, China)

#### Experimental Section

##### Materials:

Iridium(III) chloride trihydrate (IrCl<sub>3</sub>·3H<sub>2</sub>O), potassium persulfate (K<sub>2</sub>S<sub>2</sub>O<sub>8</sub>), manganese(II) chloride (MnCl<sub>2</sub>), potassium hydroxide (KOH), and anhydrous ethanol (C<sub>2</sub>H<sub>5</sub>O<sub>5</sub>) were purchased from Shanghai Macklin Biochemical Technology Co., Ltd. Nafion perfluorinated resin solution (5 wt.%) was purchased from Alfa Aesar (China) Chemical Co., Ltd. All reagents used in this work were of analytical grade and used without further purification.

##### Preparation of β-MnO<sub>2</sub>:

503.4 mg of MnCl<sub>2</sub> and 1081 mg of K<sub>2</sub>S<sub>2</sub>O<sub>8</sub> were added into a polytetrafluoroethylene (PTFE) liner of a 50 mL autoclave. 20 mL of deionized water was added to the liner together with a magnetic stir bar. The liner was sealed and the mixture was stirred for 1 hour to ensure homogeneity. Subsequently, the liner was placed in the autoclave outer shell, tightened, and transferred to an oven for hydrothermal treatment at 150 °C for 24 hours. After the reaction, the black precipitate was collected by centrifugation, washed several times with anhydrous ethanol and deionized water successively, and finally dried in an oven at 80 °C for 12 hours to obtain the black solid product β-MnO<sub>2</sub>.

##### Preparation of Ir-MnO<sub>2</sub>:

The preparation procedure was the same as that for β-MnO<sub>2</sub>, except that 74.2 mg, 156.7 mg, 248.9 mg, and 352.6 mg of IrCl<sub>3</sub>·3H<sub>2</sub>O were respectively added to the precursor solution to obtain the Ir<sub>0.05</sub>Mn<sub>0.95</sub>O<sub>2</sub>, Ir<sub>0.10</sub>Mn<sub>0.90</sub>O<sub>2</sub>, Ir<sub>0.15</sub>Mn<sub>0.85</sub>O<sub>2</sub>, and Ir<sub>0.20</sub>Mn<sub>0.80</sub>O<sub>2</sub> samples.

##### Characterization:

The morphology and crystal plane structure of the different samples were characterized by scanning electron microscopy (SEM, HITACHI SU8010) and high-resolution transmission electron microscopy (HRTEM, FEI Talos F200X). Phase composition and structural analysis were performed by X-ray diffraction (XRD, Bruker D8 Advance) using Cu K<sub>α</sub> radiation at a scan rate of 5° min<sup>-1</sup>. The valence states of the elements in the samples were characterized by X-ray photoelectron spectroscopy

(XPS). Prior to data processing, the binding energies were calibrated using the C 1s peak at 284.8 eV. The specific surface of the samples were analyzed by BET tester (BSD-PM1, Bester Instrument Technology Co, Ltd, China). Inductively coupled plasma mass spectrometry(ICP-MS) was obtained on agilent ICPOES730.

### Electrochemical measurements:

Electrochemical performance tests were carried out at room temperature using a CHI 760E electrochemical workstation in a three-electrode system. The oxygen evolution reaction (OER) was evaluated in 1 M KOH electrolyte, with a mercury/mercury oxide (Hg/HgO) electrode as the reference electrode and a platinum plate as the counter electrode. Working electrode preparation: 10 mg of catalyst was dispersed in a solution composed of 800  $\mu\text{L}$  of anhydrous ethanol, 180  $\mu\text{L}$  of deionized water, and 20  $\mu\text{L}$  of Nafion. The mixture was then ultrasonicated for 1 hour to form a homogeneous catalyst ink. Subsequently, 5  $\mu\text{L}$  of the catalyst ink was pipetted each time onto a carbon paper (with both length and width of 5 mm). After drying, another aliquot of the catalyst ink was dropped, and this process was repeated for a total of eight times, resulting in a catalyst loading of approximately 0.4 mg. Prior to the measurements, the electrode was scanned by cyclic voltammetry until stabilization, and then linear sweep voltammetry (LSV) curves were recorded at a scan rate of 5  $\text{mV s}^{-1}$ . All potentials were converted to the reversible hydrogen electrode (RHE) scale using the following formula:

$$E(\text{vs.RHE}) = E(\text{vs.Hg/HgO}) + 0.098 \text{ V} + 0.059 \times \text{pH} \quad (\text{pH} = 13.8) \quad (1)$$

The Tafel plots were obtained by fitting the polarization curves to the equation  $\eta = b \log(j) + a$ , where  $\eta$  is the overpotential,  $j$  is the current density, and  $b$  is the Tafel slope. Electrochemical impedance spectroscopy (EIS) was performed at a potential of 0.22 V (vs. RHE) with an amplitude of 5 mV over a frequency range from 1 Hz to 300 kHz. Cyclic voltammetry (CV) scans were conducted in the potential range of 0.32 to 0.37 V (vs. RHE) at scan rates from 10 to 120  $\text{mV s}^{-1}$  to determine the electrochemical double-layer capacitance ( $C_{\text{dl}}$ ).

The turnover frequency (TOF) is calculated from the equation below:

$$T O F = \frac{I}{4 F n} \quad (2)$$

Where  $I$  is the current (A) during linear sweep measurement,  $F$  is the Faraday constant ( $96485.3 \text{ C mol}^{-1}$ ), and  $n$  is the mole number of active metals on the electrode.

AEMWE tests: 40 mg of  $\text{Ir}_{0.20}\text{Mn}_{0.80}\text{O}_2$  or commercial  $\text{RuO}_2$  catalyst was mixed with 3200  $\mu\text{L}$  of anhydrous ethanol, 720  $\mu\text{L}$  of deionized water, and 80  $\mu\text{L}$  of Nafion solution, followed by ultrasonication for 1 hour to form a homogeneous solution. The solution was then sprayed onto a 1 cm  $\times$  1 cm nickel foam (loading of ca. 1  $\text{mg cm}^{-2}$  for both catalysts), which was subsequently hot-pressed and used as the anode catalyst. Commercial Pt/C catalyst was loaded onto carbon paper as the cathode catalyst, and 1 M KOH was used as the electrolyte. Polarization curves were obtained by fitting the voltages measured at different current densities. Durability tests were performed by chronopotentiometry in 1 M KOH electrolyte at a temperature of 25  $^\circ\text{C}$  and a current density of 1  $\text{A cm}^{-2}$ .

### Theoretical calculations:

Since high-resolution transmission electron microscopy (HRTEM) revealed that the predominant exposed crystal plane of  $\beta$ -MnO<sub>2</sub> is the (110) plane, while that of Ir<sub>0.20</sub>Mn<sub>0.80</sub>O<sub>2</sub> is the (211) plane, different surface slabs were constructed for the calculations: the (110) surface slab model of  $\beta$ -MnO<sub>2</sub> and the (211) surface slab model of Ir<sub>0.20</sub>Mn<sub>0.80</sub>O<sub>2</sub>. Both models consist of three layers with the same number of atoms. Specifically, the (110) slab model of  $\beta$ -MnO<sub>2</sub> contains 12 Mn atoms and 24 O atoms, while the (211) slab model of Ir<sub>0.20</sub>Mn<sub>0.80</sub>O<sub>2</sub> contains 10 Mn atoms, 2 Ir atoms, and 24 O atoms. Density functional theory (DFT) calculations were performed using the Vienna Ab initio Simulation Package (VASP) to analyze the free energy diagrams of the catalytic reactions for the different models<sup>1, 2</sup>. The projector augmented wave (PAW) method was employed to describe the ion–electron interaction, and the exchange–correlation effects were treated using the Perdew–Burke–Ernzerhof (PBE) functional within the generalized gradient approximation (GGA)<sup>3,4</sup>. In the calculations, the plane-wave cutoff energy was set to 500 eV, the energy convergence criterion was  $1 \times 10^{-5}$  eV, and the force convergence criterion was  $-0.02$  eV/Å. A k-point mesh of  $3 \times 3 \times 1$  was used, and a vacuum layer of approximately 15 Å was applied perpendicular to the surface to avoid interlayer interactions. The reaction free energy  $\Delta G$  was determined using the computational hydrogen electrode (CHE) model, as shown in the following equation:

$$\Delta G = \Delta E + \Delta ZPE - T\Delta S \quad (3)$$

where  $\Delta E$ ,  $\Delta ZPE$ ,  $T$ , and  $\Delta S$  represent the change in reaction energy, zero-point energy, temperature, and change in entropy, respectively.

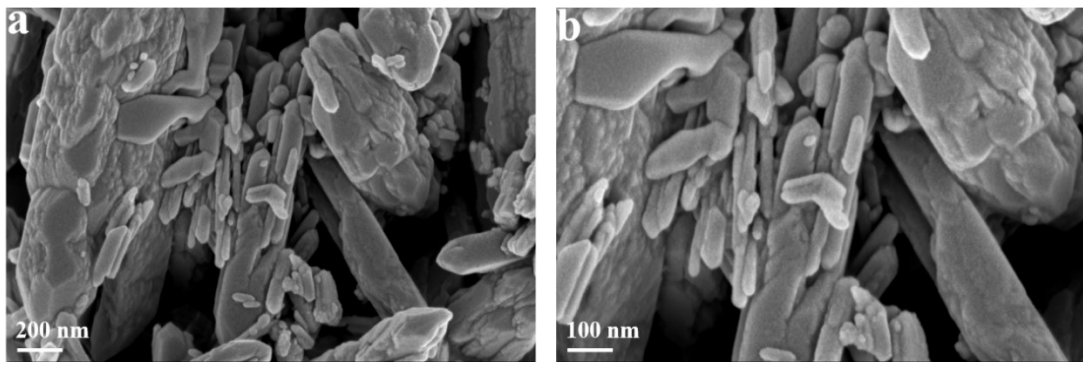

**Fig.S1** The SEM images of  $\beta$ -MnO<sub>2</sub>

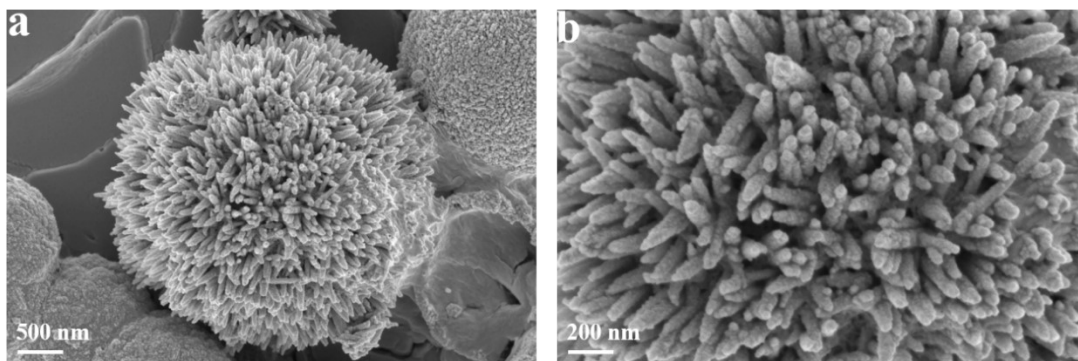

**Fig.S2** The SEM images of Ir<sub>0.20</sub>Mn<sub>0.80</sub>O

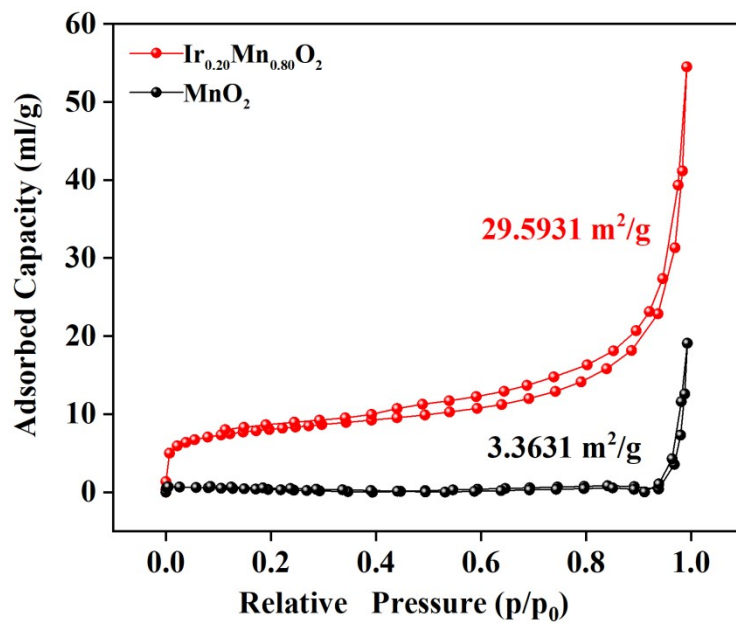

**Fig.S3** Specific surface area measurement results of  $\text{Ir}_{0.20}\text{Mn}_{0.80}\text{O}_2$  and  $\text{MnO}_2$

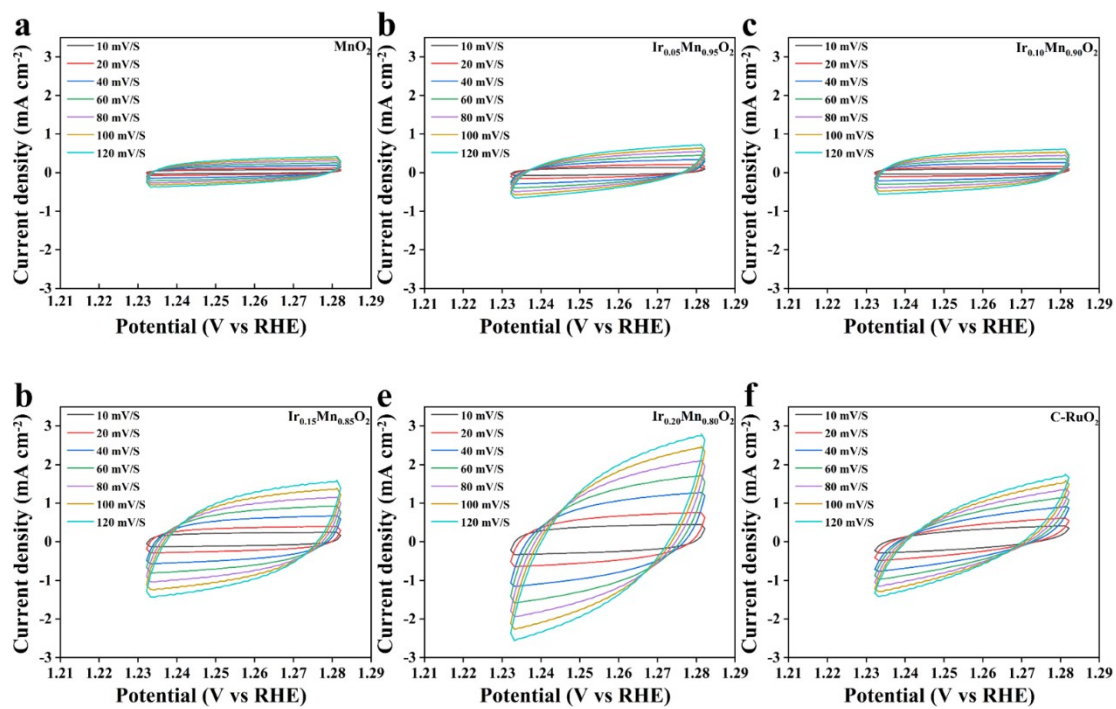

**Fig.S4** The CV curves of (a)  $\text{MnO}_2$ , (b)  $\text{Ir}_{0.05}\text{Mn}_{0.95}\text{O}_2$ , (c)  $\text{Ir}_{0.10}\text{Mn}_{0.90}\text{O}_2$ , (d)  $\text{Ir}_{0.15}\text{Mn}_{0.85}\text{O}_2$ , (e)  $\text{Ir}_{0.20}\text{Mn}_{0.80}\text{O}_2$  and (f)  $\text{C-RuO}_2$  with different scan rates from 10 to  $120 \text{ mV S}^{-1}$

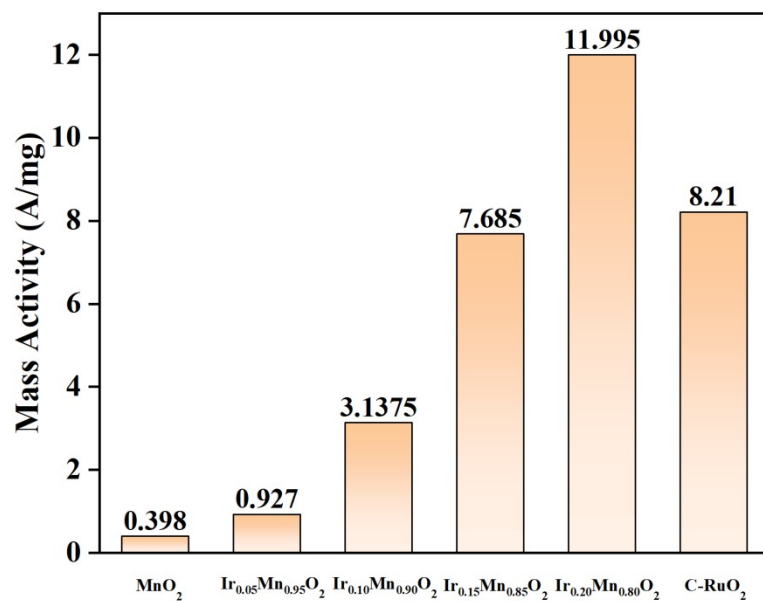

**Fig.S5** Mass activities of different samples at an overpotential of  $\eta = 300$  mV

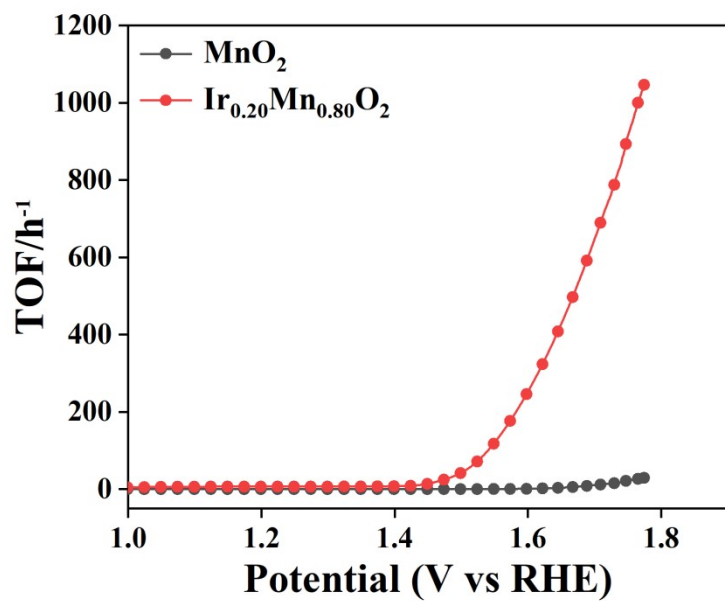

**Fig.S6** TOF of  $\text{Ir}_{0.20}\text{Mn}_{0.80}\text{O}_2$  and  $\text{MnO}_2$

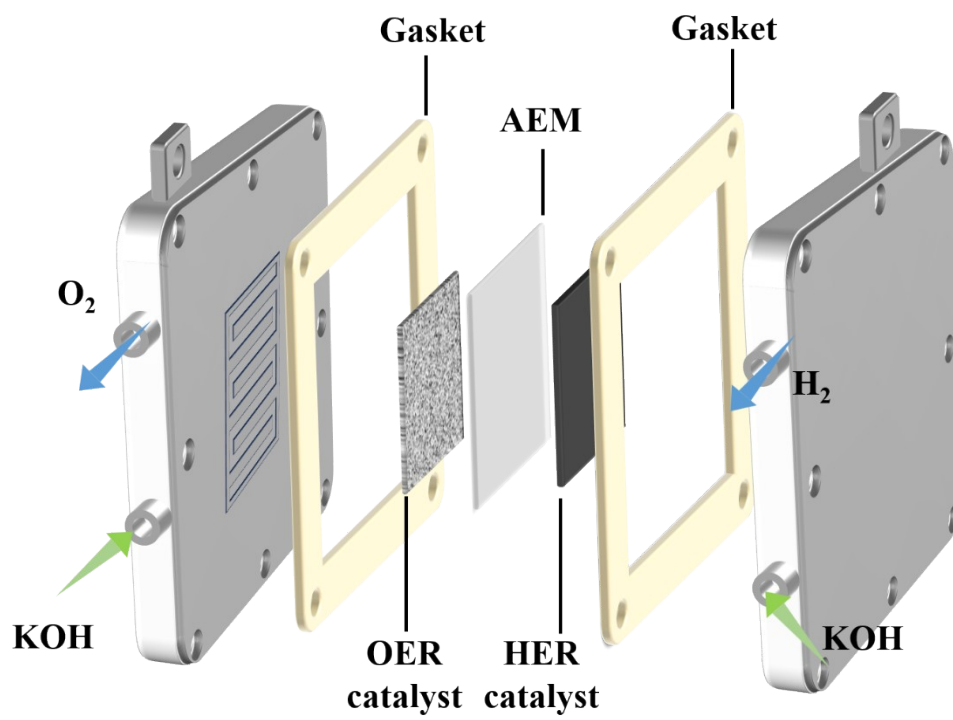

**Fig.S7** Schematic diagram of the anion exchange membrane electrolyzer.

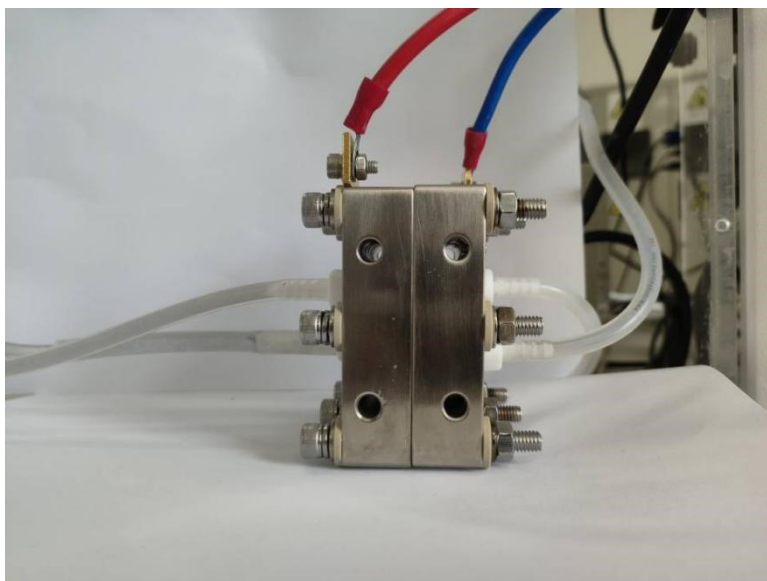

**Fig.S8** Photograph of the anion exchange membrane electrolyzer

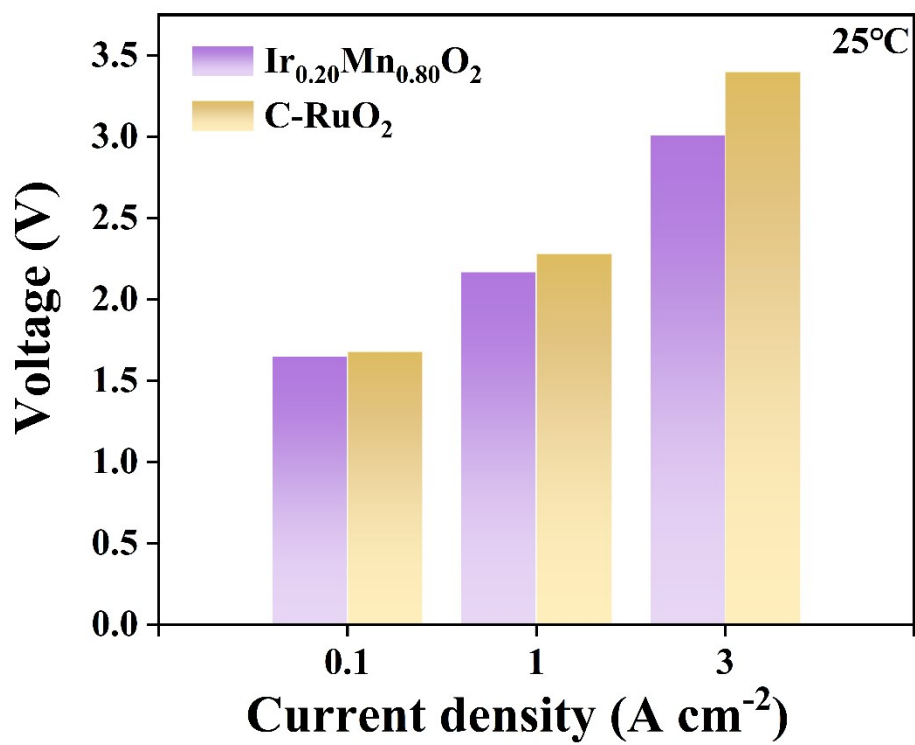

**Fig.S9** The voltages of  $\text{Ir}_{0.20}\text{Mn}_{0.80}\text{O}_2$  and commercial  $\text{RuO}_2$  at different current densities

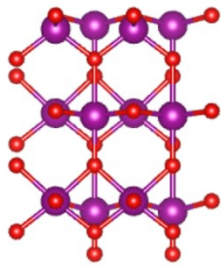

**$\beta$ -MnO<sub>2</sub>**  
**(110)**

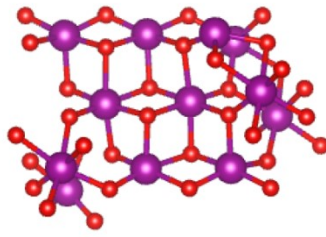

**$\alpha$ -MnO<sub>2</sub>**  
**(211)**

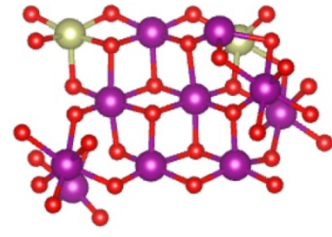

**Ir-MnO<sub>2</sub>**  
**(211)**

**Fig.S10** Computational models of  $\beta$ -MnO<sub>2</sub> ,  $\alpha$ -MnO<sub>2</sub> and Ir<sub>0.20</sub>Mn<sub>0.80</sub>O<sub>2</sub>

**Table S1.** ICP data of  $\text{Ir}_{0.20}\text{Mn}_{0.80}\text{O}_2$ 

| <b>Samples</b>                               | <b>Ir(wt%)</b> | <b>Mn(wt%)</b> | <b>Ir/Mn atomic ratio</b> |
|----------------------------------------------|----------------|----------------|---------------------------|
| $\text{Ir}_{0.20}\text{Mn}_{0.80}\text{O}_2$ | 25.9656%       | 30.5432%       | 1 : 4.115                 |
| $\text{Ir}_{0.20}\text{Mn}_{0.80}\text{O}_2$ | 26.4588%       | 30.5535%       | 1 : 4.04                  |
| $\text{Ir}_{0.20}\text{Mn}_{0.80}\text{O}_2$ | 26.3912%       | 30.3101%       | 1 : 4.02                  |

**Table S2.** Calculated average oxidation state (AOS) data of MnO<sub>2</sub> and Ir<sub>0.20</sub>Mn<sub>0.80</sub>O<sub>2</sub>

| <b>Sample</b>                                        | <b>Eb1 (eV)</b> | <b>Eb2 (eV)</b> | <b><math>\Delta E_{3s}</math> (eV)</b> | <b>AOS</b> |
|------------------------------------------------------|-----------------|-----------------|----------------------------------------|------------|
| MnO <sub>2</sub>                                     | 83.49           | 88.01           | 4.52                                   | 3.9296     |
| Ir <sub>0.20</sub> Mn <sub>0.80</sub> O <sub>2</sub> | 84.12           | 89.76           | 5.64                                   | 2.5072     |

**Table S3.** Comparison of the OER activity of  $\text{Ir}_{0.20}\text{Mn}_{0.80}\text{O}_2$  with other reported electrocatalysts.

| Catalyst                                                       | Electrolyte                          | (mV vs. RHE) @ 10mA/cm <sup>2</sup> | Tafel slope (mV/dec) | Ref.             |
|----------------------------------------------------------------|--------------------------------------|-------------------------------------|----------------------|------------------|
| <b><math>\text{Ir}_{0.20}\text{Mn}_{0.80}\text{O}_2</math></b> | <b>1 M KOH</b>                       | <b>269</b>                          | <b>116.88</b>        | <b>This work</b> |
| $\text{MnO}_2$ -0.5IL                                          | 1 M KOH                              | 394                                 | 49                   | 5                |
| $\beta$ - $\text{MnO}_2$ -Ru                                   | 1 M KOH                              | 278                                 | 62                   | 6                |
| Ir-MnO <sub>x</sub>                                            | 1 M HClO <sub>4</sub>                | 270                                 | 51.5                 | 7                |
| Ir-Ir $\alpha$ MnO <sub>2</sub>                                | 0.1 M HClO <sub>4</sub>              | 268                                 | 55.71                | 8                |
| Se-MnO <sub>2</sub>                                            | 0.5 M H <sub>2</sub> SO <sub>4</sub> | 345                                 | 64.5                 | 9                |
| Nd- $\gamma$ -MnO <sub>2</sub>                                 | 1 M H <sub>2</sub> SO <sub>4</sub>   | 391                                 | 88                   | 10               |
| Ir-Co <sub>3</sub> O <sub>4</sub>                              | 0.5 M H <sub>2</sub> SO <sub>4</sub> | 236                                 | 52.6                 | 11               |
| IrO <sub>2</sub> /MnO <sub>2</sub>                             | 0.5 M H <sub>2</sub> SO <sub>4</sub> | 300                                 | 32                   | 12               |
| Ir <sub>0.4</sub> /Mn <sub>0.6</sub>                           | 0.5 M H <sub>2</sub> SO <sub>4</sub> | 286                                 | 40                   | 13               |
| Mn <sub>0.1</sub> Ir <sub>0.9</sub> O <sub>2</sub>             | 0.5 M H <sub>2</sub> SO <sub>4</sub> | 269                                 | 45                   | 14               |

**Table S4.** ICP-MS data of Mn ions in the electrolyte after stability testing of MnO<sub>2</sub> and Ir<sub>0.20</sub>Mn<sub>0.80</sub>O<sub>2</sub>

| <b>Sample Name</b>                                   | <b>Element</b> | <b>Content (µg/L)</b> |
|------------------------------------------------------|----------------|-----------------------|
| MnO <sub>2</sub>                                     | Mn             | 1.1113                |
| Ir <sub>0.20</sub> Mn <sub>0.80</sub> O <sub>2</sub> | Mn             | 0.6799                |

## References

1. G. Kresse and J. Furthmüller, Efficiency of ab-initio total energy calculations for metals and semiconductors using a plane-wave basis set, *Comput. Mater. Sci.*, 1996, **15**, 10.
2. P. E. Blöchl, Projector augmented-wave method, *Phys. Rev. B*, 1994, **50**, 17953-17979.
3. G. Kresse and J. Furthmüller, Efficient iterative schemes for ab initio total-energy calculations using a plane-wave basis set, *Phys. Rev. B*, 1996, **54**, 16.
4. G. Kresse and D. Joubert, From ultrasoft pseudopotentials to the projector augmented-wave method, *Phys. Rev. B*, 1999, **59**, 3.
5. G. Yan, Y. Lian, Y. Gu, C. Yang, H. Sun, Q. Mu, Q. Li, W. Zhu, X. Zheng, M. Chen, J. Zhu, Z. Deng and Y. Peng, Phase and Morphology Transformation of MnO<sub>2</sub> Induced by Ionic Liquids toward Efficient Water Oxidation, *ACS Catalysis*, 2018, **8**, 10137-10147.
6. Y. Qin, Y. Liu, Y. Zhang, Y. Gu, Y. Lian, Y. Su, J. Hu, X. Zhao, Y. Peng, K. Feng, J. Zhong, M. H. Rummeli and Z. Deng, Ru-Substituted MnO<sub>2</sub> for Accelerated Water Oxidation: The Feedback of Strain-Induced and Polymorph-Dependent Structural Changes to the Catalytic Activity and Mechanism, *ACS Catalysis*, 2022, **13**, 256-266.
7. L. Quan, Y. Cao, J. Liu, B. Y. Xia, X. Zhao and B. You, Wrinkled Ir-MnOx nanospheres as pH-universal electrocatalysts for oxygen evolution reaction, *Journal of Materials Chemistry A*, 2024, **12**, 19958-19967.
8. X. Teng, K. Zhang, Z. Yang, H. Zhao, J. Yun and J. Zhang, Surface atomic step iridium nanocrystals on  $\alpha$ MnO<sub>2</sub> enhance oxygen evolution reaction performance, *Electrochimica Acta*, 2026, **549**, 148065.
9. S. Pan, S. Wang, Z. Xie, H. Li, Y. Fu and D. Wang, Se-doped MnO<sub>2</sub> as a low-cost and high-efficiency catalyst for acidic oxygen evolution reaction, *Nano Research*, 2025, **18**, 94907912.
10. Q. Hu, A. Li, Y. Sun, L. Liu, T. Liu, C. Li and H. Han, Tailor Control of Neodymium Doping Sites in  $\gamma$ -MnO<sub>2</sub> for Stable Oxygen Evolution Reaction in Acidic Electrolyte, *Advanced Functional Materials*, 2025, **36**, 2423709.
11. Y. Zhu, J. Wang, T. Koketsu, M. Kroschel, J.-M. Chen, S.-Y. Hsu, G. Henkelman, Z. Hu, P. Strasser and J. Ma, Iridium single atoms incorporated in Co<sub>3</sub>O<sub>4</sub> efficiently catalyze the oxygen evolution in acidic conditions, *Nature Communications*, 2022, **13**, 7754.
12. F. Wang, J. Sui, Z. Wang, S. Ling, W. Zhang, Y. Yan, J. Qi and X. Luo, IrO<sub>2</sub>/MnO<sub>2</sub> metal oxide-support interaction enables robust acidic water oxidation, *Journal of Colloid and Interface Science*, 2025, **683**, 160-169.
13. Z. Zhou, W. Q. Zaman, W. Sun, L.-m. Cao, M. Tariq and J. Yang, Cultivating crystal lattice distortion in IrO<sub>2</sub> via coupling with MnO<sub>2</sub> to boost the oxygen evolution reaction with high intrinsic activity, *Chemical Communications*, 2018, **54**, 4959-4962.
14. H. Gao, C. Song, R. Chen, T. Wu, J. Zou, S. Du, C.-L. Dong, Y.-C. Huang, R. Zhu, Y. Wang and S. Wang, Activation of iridium site based on IrO<sub>2</sub> catalysts

towards highly stable PEM water electrolyzer, *Chemical Engineering Science*, 2025, **302**,120912.
